# Supplementary material for: Twisted coumarin dyes for dye-sensitized solar cells with high photovoltage: adjustment of optical, electrochemical, and photovoltaic properties by the molecular structure
Source: Royal Society of Chemistry journal article supplement (doi:10.1039/c6ra17930d), 2016-01-01
Supplement: c6ra17930d1.pdf [file c6ra17930d1.pdf]

*Electronic Supplementary Information*

**Twisted coumarin dyes for dye-sensitized solar cells with high photovoltage: Adjustment of optical, electrochemical, and photovoltaic properties by molecular structure**

Qinghua Chen, Nan Wu, Yanyan Liu, Xiaoyan Li\*, Bo Liu\*

College of Chemistry and Material Science, Hebei Normal University, No. 20, East Road of Nan Er Huan, Shijiazhuang 050023, P. R. China. E-mail: liubo@mail.hebtu.edu.cn; Tel: +86-311-80787400

## Contents

1. Scheme S1 Synthetic routes of coumarin dyes **CS-3**, **CS-4**, and **CS-5**. i: toluene, piperidine, reflux for 12h; ii: Pd(PPh<sub>3</sub>)<sub>4</sub>, K<sub>2</sub>CO<sub>3</sub>, dioxane, reflux for 12h.
2. Fig.S1 The optimized ground-state geometries of **CS-3**, **CS-4**, and **CS-5** simulated on the basis of hybrid density functional theory (B3LYP) with the 6-31G\* basis set as implemented in the Gaussian 09 program.
3. Fig. S2 Oxidative cyclic voltammetry plots of **CS-3**, **CS-4**, and **CS-5** measured with using dye-loaded TiO<sub>2</sub> film as the working electrode, a saturated calomel (SCE) reference electrode, and a platinum wire as the counter electrode.
4. Fig. S3-S8 <sup>1</sup>H and <sup>13</sup>C NMR spectra of all intermediates and target compounds.

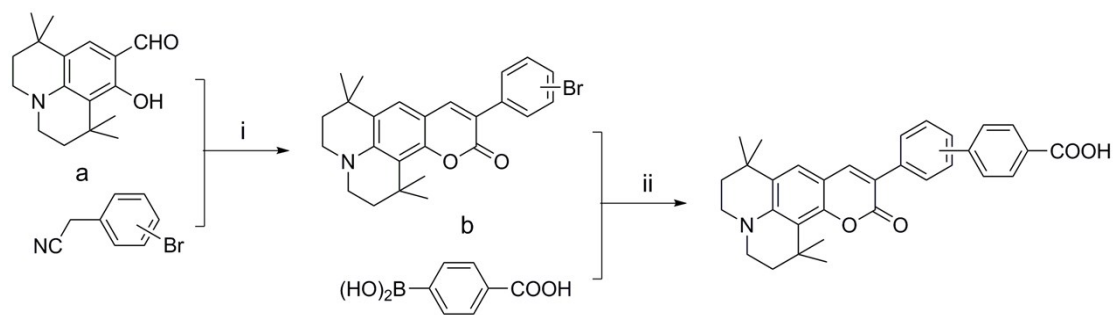

*ortho*-isomer: **CS-3**    *meta*-isomer: **CS-4**    *para*-isomer: **CS-5**

Scheme S1. Synthetic routes of coumarin dyes **CS-3**, **CS-4**, and **CS-5**. i: toluene, piperidine, reflux for 12h; ii: Pd(PPh<sub>3</sub>)<sub>4</sub>, K<sub>2</sub>CO<sub>3</sub>, dioxane, reflux for 12h.

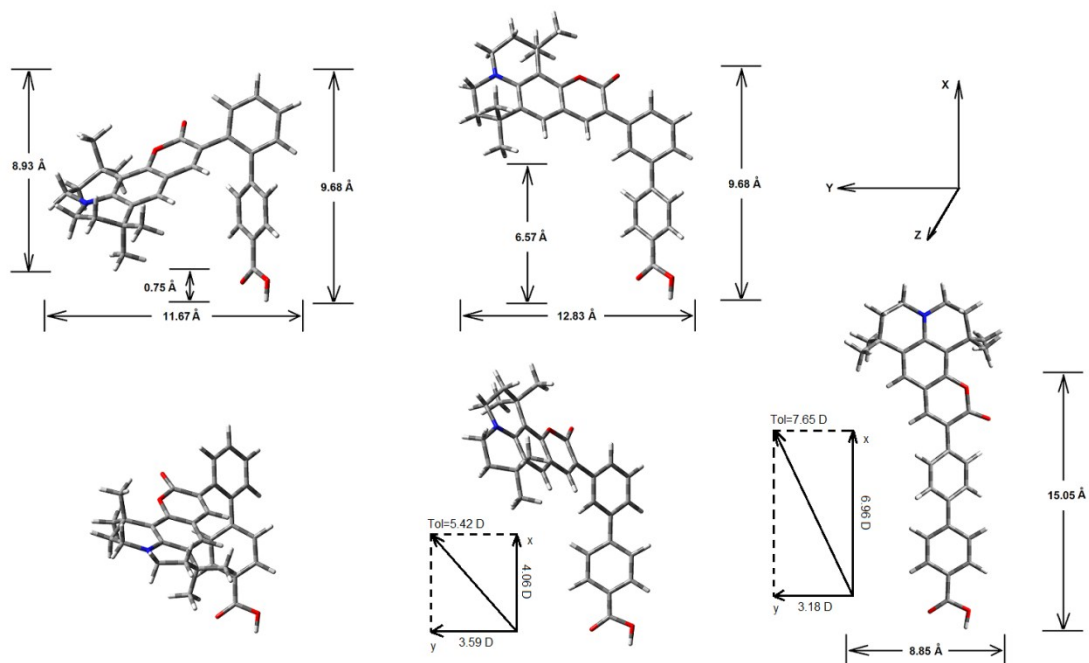

Fig.S1 The optimized ground-state geometries of CS-3, CS-4, and CS-5 simulated on the basis of hybrid density functional theory (B3LYP) with the 6-31G\* basis set as implemented in the Gaussian 09 program.

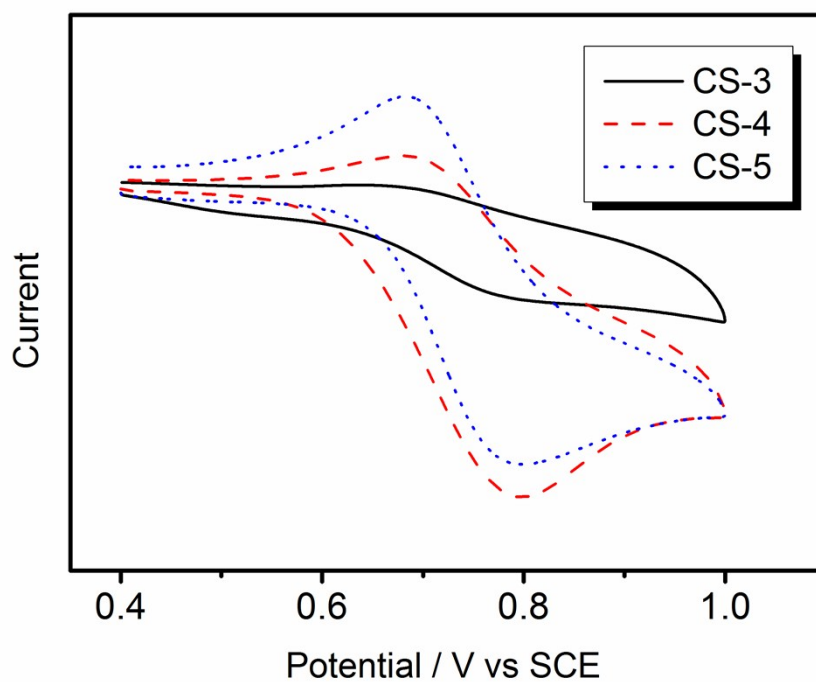

Fig. S2 Oxidative cyclic voltammetry plots of CS-3, CS-4, and CS-5 measured with using dye-loaded TiO<sub>2</sub> film as the working electrode, a saturated calomel (SCE) reference electrode, and a platinum wire as the counter electrode.

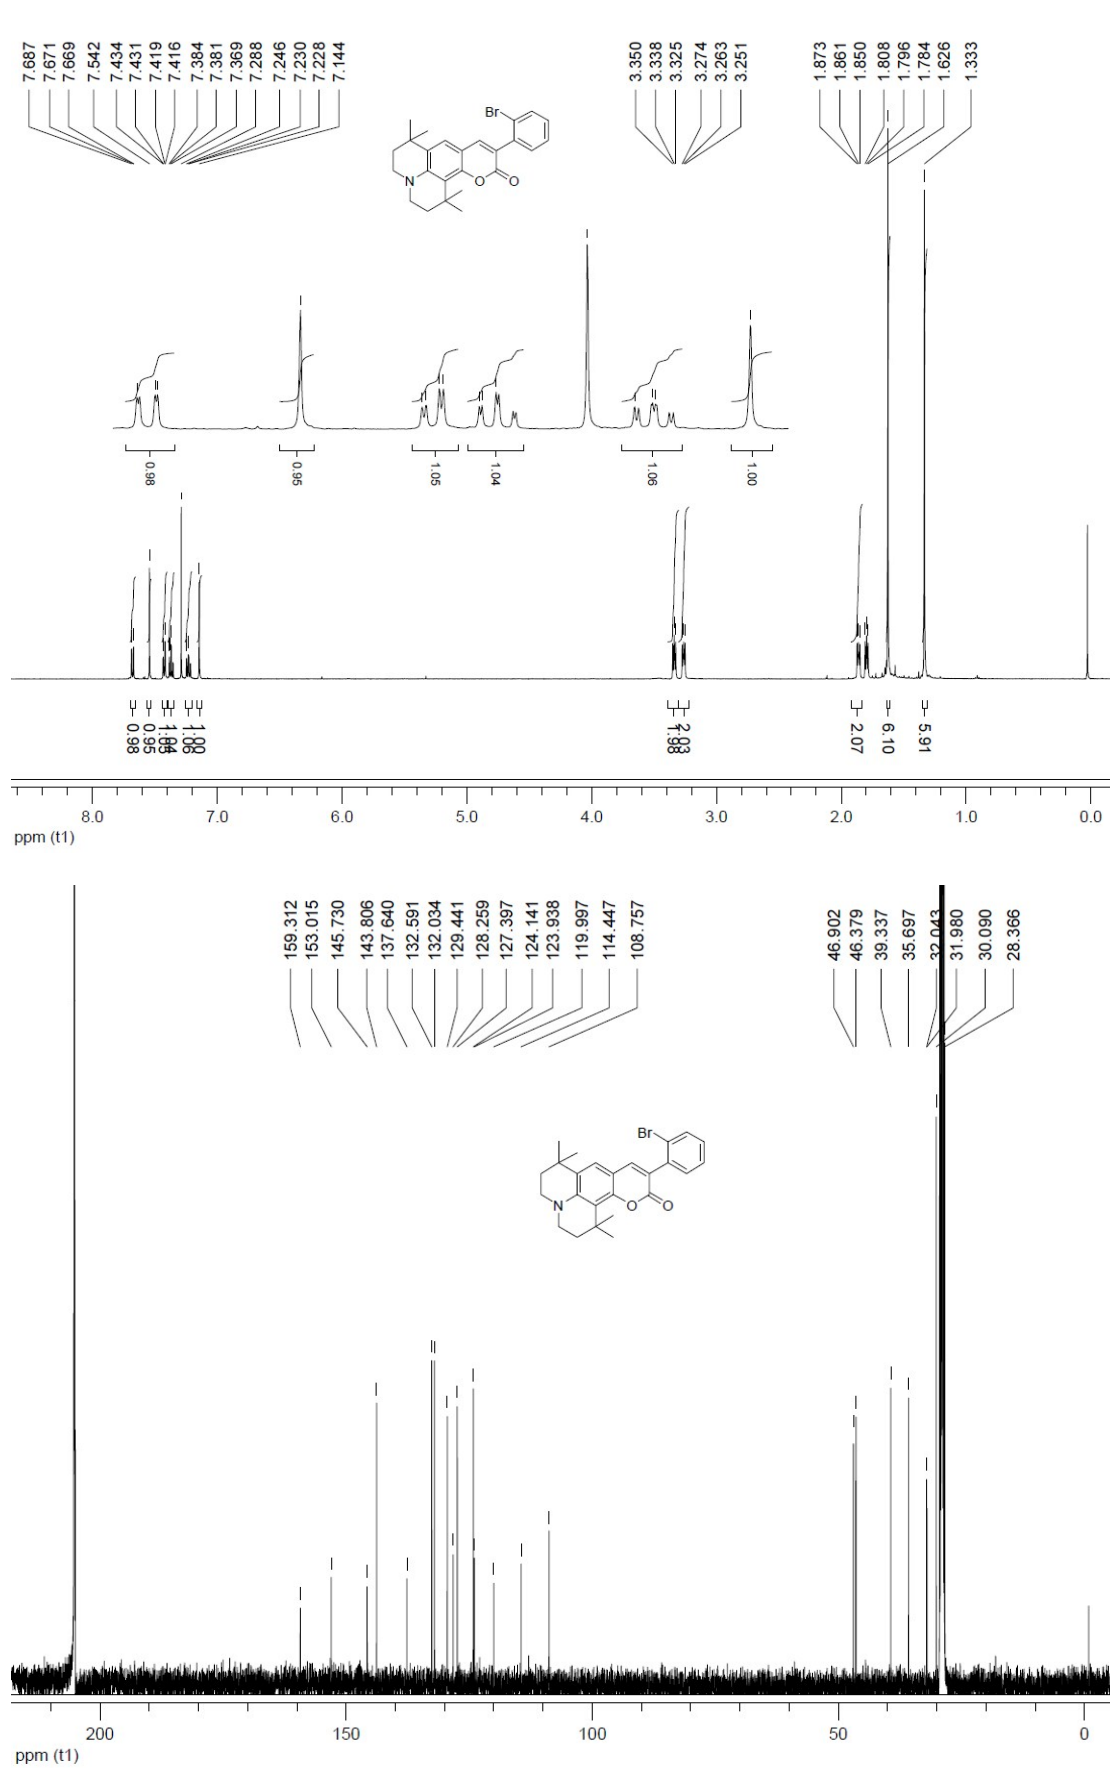

Fig. S3 <sup>1</sup>H and <sup>13</sup>C NMR spectra of intermediate **b-3**.

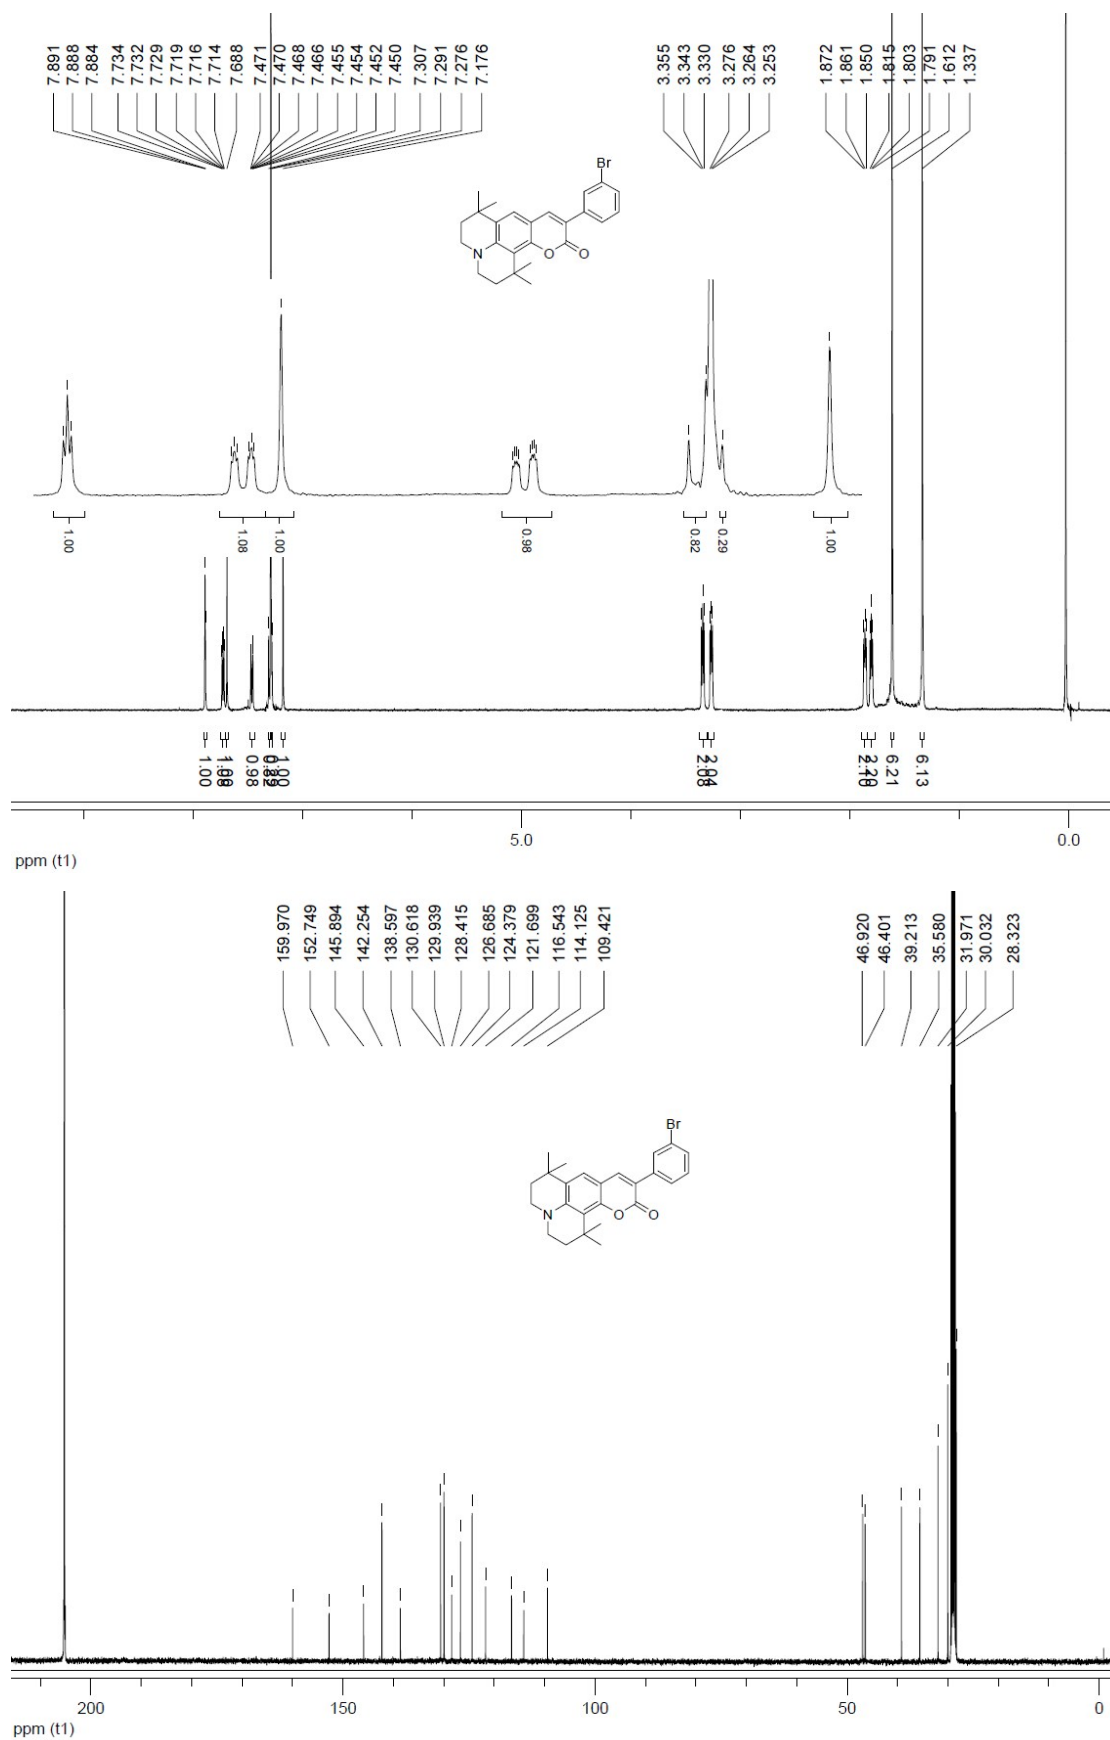

Fig. S4 <sup>1</sup>H and <sup>13</sup>C NMR spectra of intermediate **b-4**.

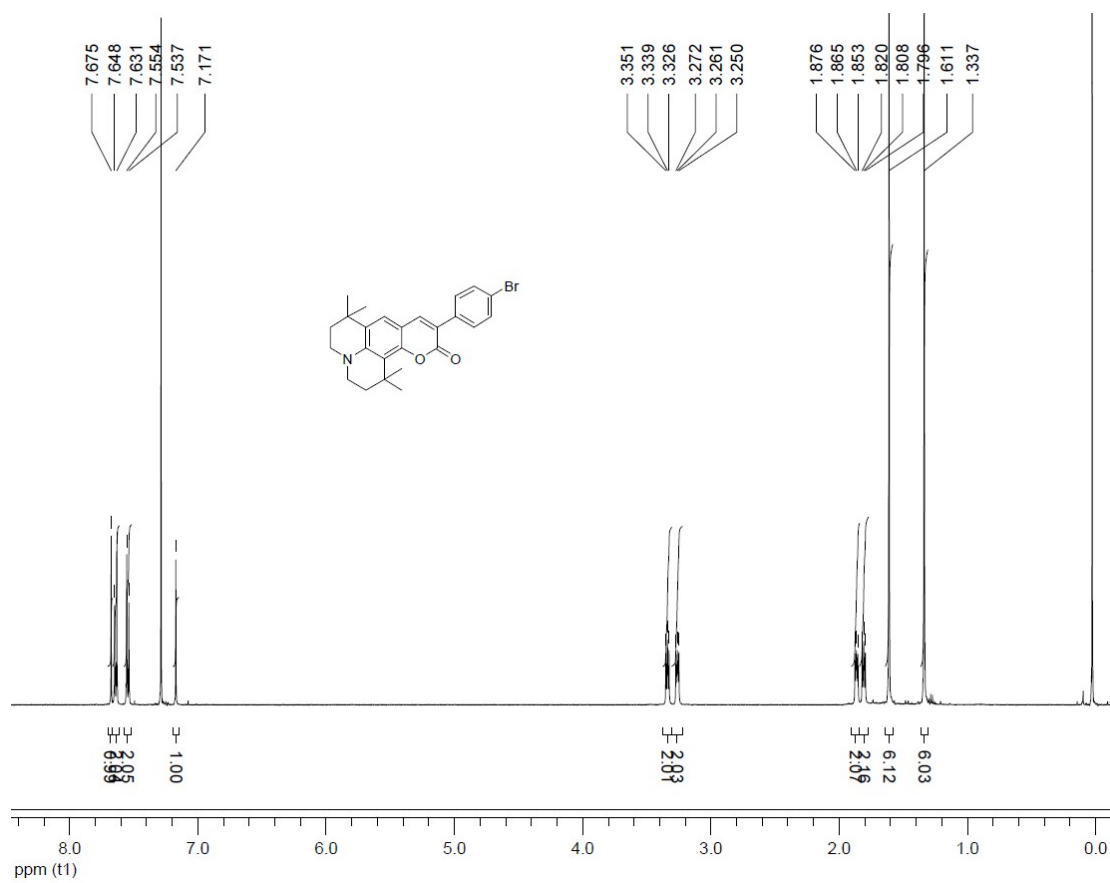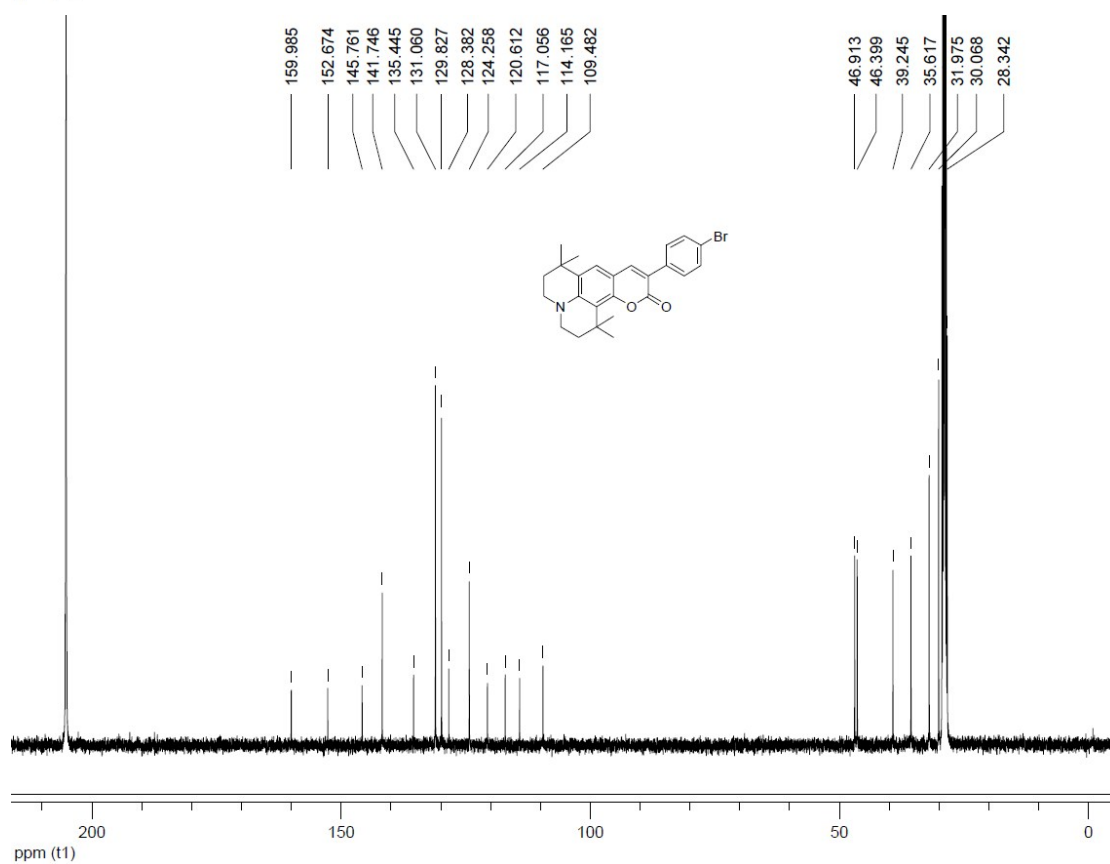

Fig. S5 <sup>1</sup>H and <sup>13</sup>C NMR spectra of intermediate **b-5**.

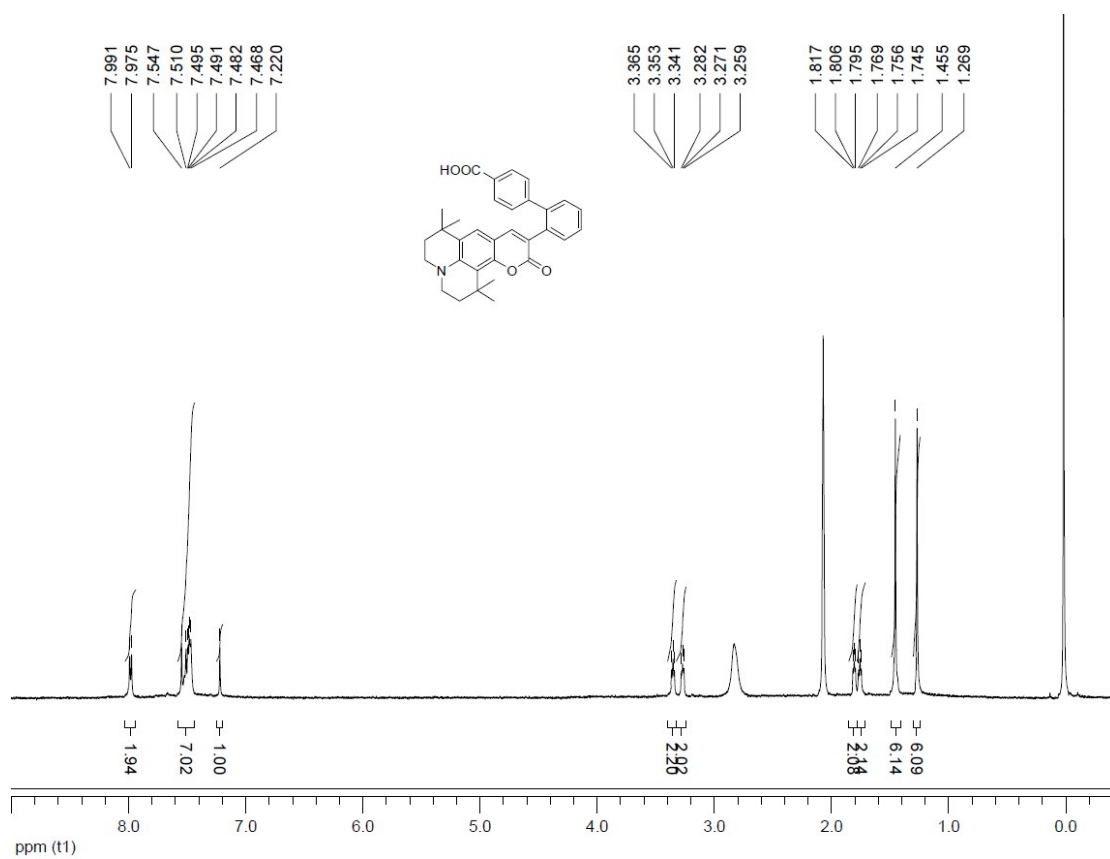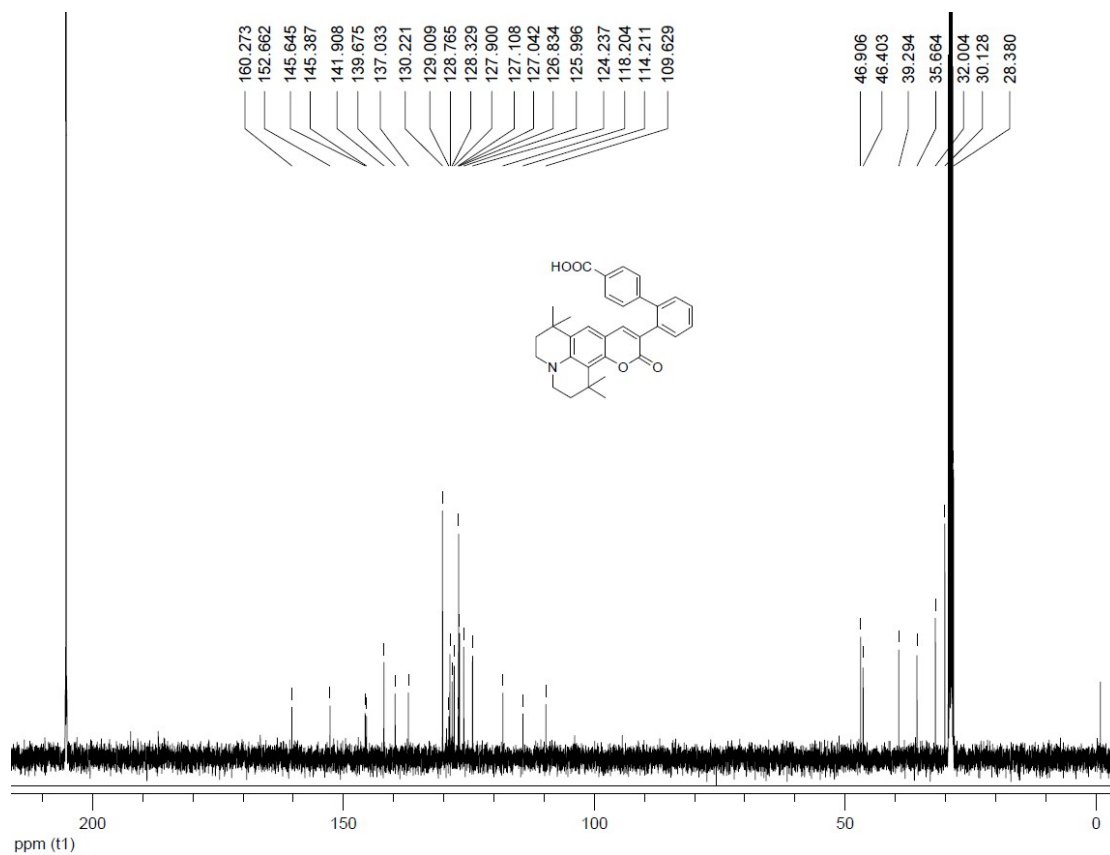

Fig. S6 <sup>1</sup>H and <sup>13</sup>C NMR spectra of intermediate CS-3.

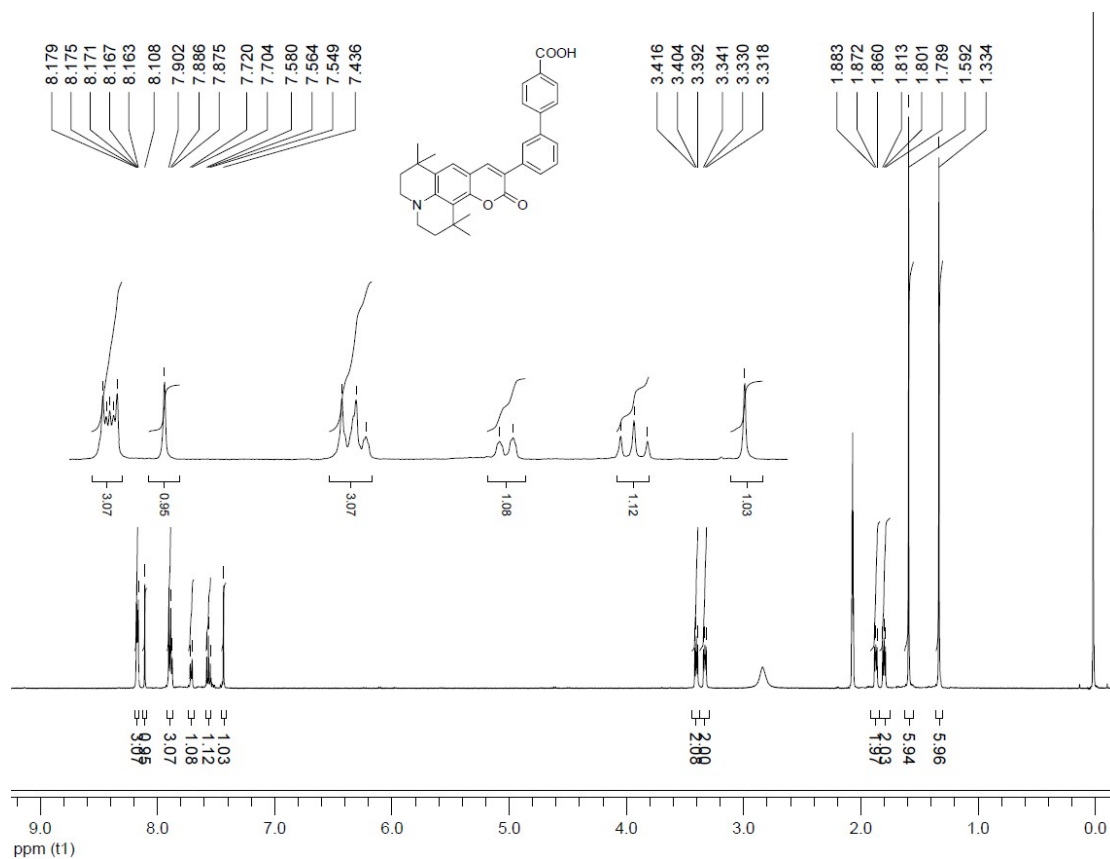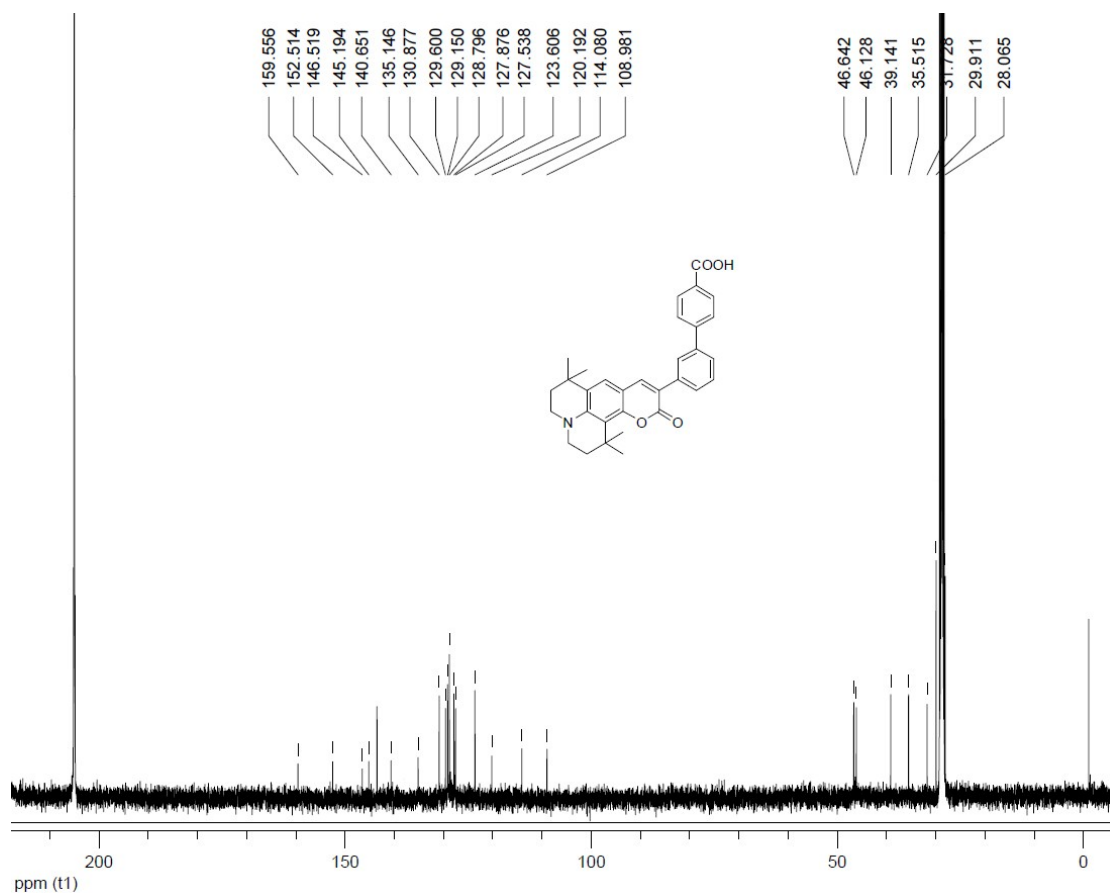

Fig. S7  $^1\text{H}$  and  $^{13}\text{C}$  NMR spectra of intermediate CS-4.



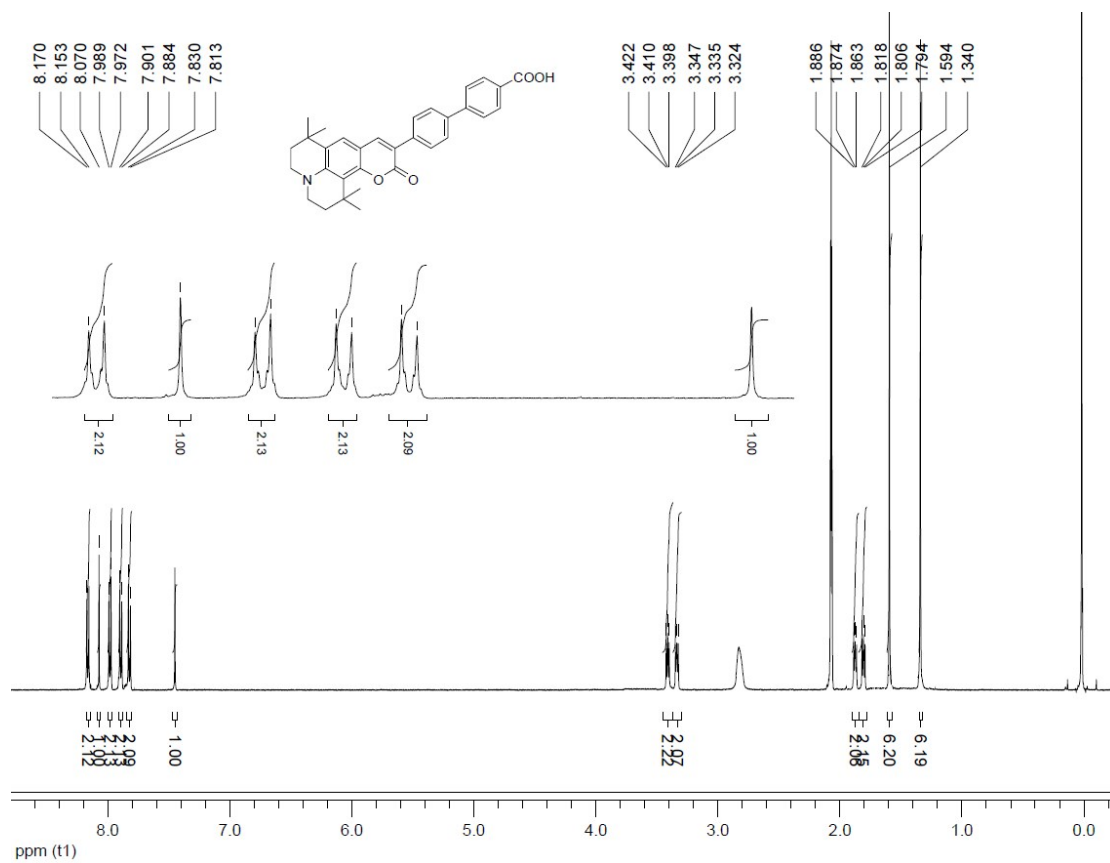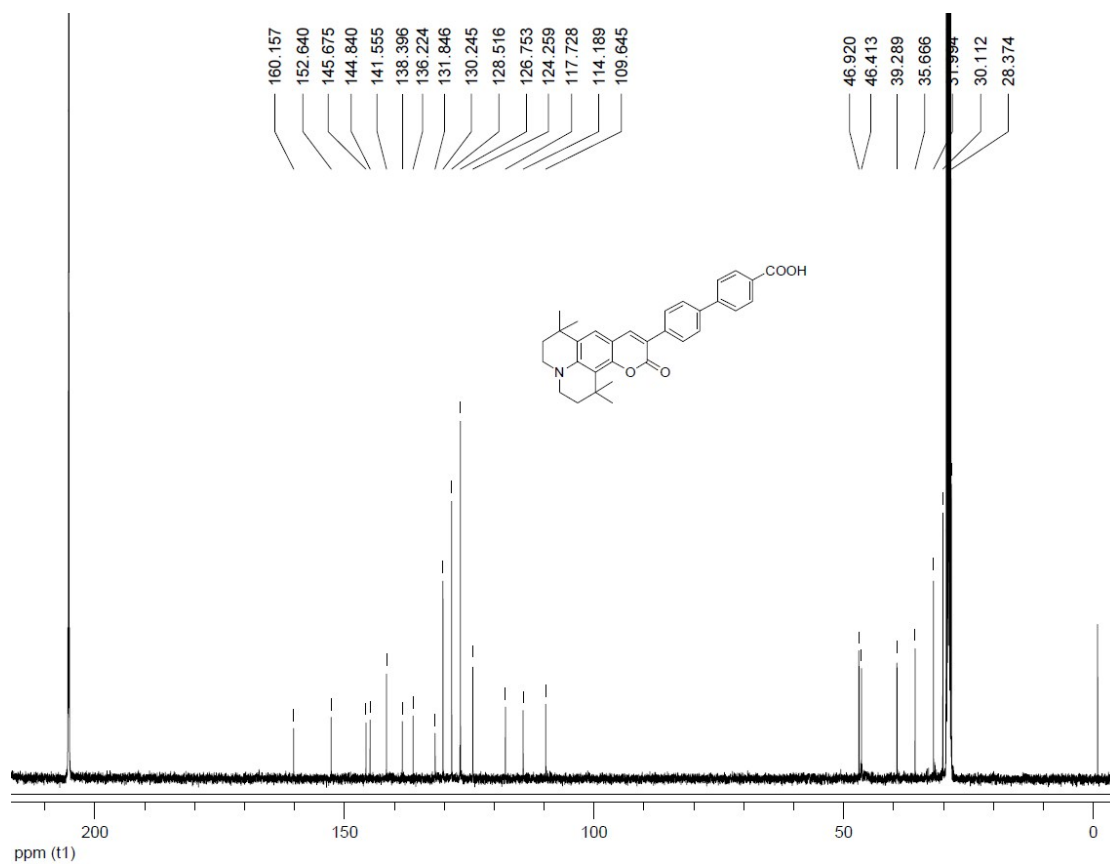

Fig. S8  $^1\text{H}$  and  $^{13}\text{C}$  NMR spectra of intermediate CS-5.
